# Supplementary material for: Phenotypic Adaptation to Antiseptics and Effects on Biofilm Formation Capacity and Antibiotic Resistance in Clinical Isolates of Early Colonizers in Dental Plaque
Source: MDPI journal article supplement (doi:10.3390/antibiotics11050688), 2022-05-19
Supplement: s1 [file s1]

# **Phenotypic adaptation toward antiseptics and effects on biofilm formation capacity and antibiotic resistance in clinical isolates of early colonizers in dental plaque**

David L. Auer<sup>1,#</sup>, Xiaojun Mao<sup>1,#</sup>, Annette Carola Anderson<sup>2</sup>, Denise Muehler<sup>1</sup>, Annette Wittmer<sup>3</sup>, Christiane von Ohle<sup>4</sup>, Diana Wolff<sup>5</sup>, Cornelia Frese<sup>5</sup>, Karl-Anton Hiller<sup>1</sup>, Tim Maisch<sup>6</sup>, Wolfgang Buchalla<sup>1</sup>, Elmar Hellwig<sup>2</sup>, Ali Al-Ahmad<sup>2,§</sup> and Fabian Cieplik<sup>1,§,\*</sup>

<sup>1</sup> Department of Conservative Dentistry and Periodontology, University Hospital Regensburg, Germany

<sup>2</sup> Department of Operative Dentistry and Periodontology, Center for Dental Medicine, Faculty of Medicine, University of Freiburg, Germany

<sup>3</sup> Institute of Medical Microbiology and Hygiene, Faculty of Medicine, University of Freiburg, Freiburg, Germany

<sup>4</sup> Department of Conservative Dentistry, Periodontology and Endodontology, University Hospital Tübingen, Germany

<sup>5</sup> Department of Conservative Dentistry, University Hospital Heidelberg, Germany

<sup>6</sup> Department of Dermatology, University Hospital Regensburg, Germany

# These authors contributed equally and share first authorship.

§ These authors contributed equally and share last authorship.

## **\* Corresponding author:**

Priv.-Doz. Dr. Fabian Cieplik

Department of Conservative Dentistry and Periodontology, University Hospital Regensburg

Franz-Josef-Strauß-Allee 11, 93053 Regensburg, Germany

Email: [fabian.cieplik@ukr.de](mailto:fabian.cieplik@ukr.de)

## **SUPPLEMENTARY INFORMATION**

**Supplementary Table S1: Primers used for the detection of antibiotic resistance genes (ARGs)**

| Target gene                  | Conferring resistance toward        | Forward and reverse primers                                                                                                    | Primer concentration | T <sub>m</sub> [°C] | Reference |
|------------------------------|-------------------------------------|--------------------------------------------------------------------------------------------------------------------------------|----------------------|---------------------|-----------|
| <i>tetM</i>                  | tetracyclines                       | tetM-f: AGTTTTAGCTCATGTTGATG<br>tetM-r: TCCGACTATTTAGACGACGG                                                                   | 100nM<br>100nM       | 55                  | [1]       |
| <i>tetO</i>                  | tetracyclines                       | tetO-f: GCGGAACATTGCATTTGAGGG<br>tetO-r: CTCTATGGACAACCCGACAGAAG                                                               | 100nM<br>100nM       | 53                  | [2]       |
| <i>tetW</i>                  | tetracyclines                       | tetW-f: GAGAGCCTGCTATATGCCAGC<br>tetW-r: GGCGGTATCCACAATGTTAAC                                                                 | 100nM<br>100nM       | 64                  | [3]       |
| <i>tetA-1</i>                | tetracyclines                       | tetA-1-f: GGCGGTCTTCTTCATCATGC<br>tetA-1-r: CGGCAGGCAGAGCAAGTAGA                                                               | 250nM<br>250nM       | 64                  | [4]       |
| <i>tetB-1</i>                | tetracyclines                       | tetB-1-f: CATTAAATAGCGCATCGCTG<br>tetB-1-r: TGAAGGTCATCGATAGCAGG                                                               | 250nM<br>250nM       | 64                  | [4]       |
| <i>tetC-1</i>                | tetracyclines                       | tetC-1-f: GCTGTAGGCATAGGCTTGGT<br>tetC-1-r: GCCGGAAGCGAGAGAATCA                                                                | 250nM<br>250nM       | 65                  | [4]       |
| <i>tetD-1</i>                | tetracyclines                       | tetD-1-f: GCAAACCATTTACGGCATTCT<br>tetD-1-r: GATAAGCTGCGCGGTAAAAA                                                              | 400nM<br>400nM       | 60                  | [5]       |
| <i>tetE-1</i>                | tetracyclines                       | tetE-1-f: TATTAACGGGCTGGCATTTC<br>tetE-1-r: AGCTGTCAGGTGGGTCAAAC                                                               | 400nM<br>400nM       | 60                  | [5]       |
| <i>bla<sub>TEM-1</sub></i>   | β-lactams                           | <i>bla<sub>TEM-1</sub></i> -f: CCAATGCTTAATCAGTGAGG<br><i>bla<sub>TEM-1</sub></i> -r: ATGAGTATTCAACATTTCCG                     | 400nM<br>400nM       | 60                  | [5]       |
| <i>cfxA</i>                  | cephamycins                         | cfxA-f: GCAAGTGCGAGTTTAAGATT<br>cfxA-r: GCTTTAGTTTGCATTTTCATC                                                                  | 200nM<br>200nM       | 58                  | [6]       |
| <i>bla<sub>CTX-M-1</sub></i> | cephalosporins                      | CTX-M-f: CGCTTTGCGATGTGCAG<br>CTX-M-r: ACCGCGATATCGTTGGT                                                                       | 100nM<br>100nM       | 56                  | [7]       |
| <i>bla<sub>CSP-1</sub></i>   | β-lactams                           | <i>bla<sub>CSP-1</sub></i> -f: TCAAATTTACATTGCATTG<br><i>bla<sub>CSP-1</sub></i> -r: CAGTGTGGGATTATTATTTTCA                    | 100nM<br>100nM       | 52                  | [8]       |
| <i>bla<sub>OXA-85</sub></i>  | β-lactams                           | <i>bla<sub>OXA-85</sub></i> -f: CCATATGTTATTATTATGTTCTCGAT<br><i>bla<sub>OXA-85</sub></i> -r: GCGGATCCCTATTTTATAACATTATATTTTTG | 1μM<br>1μM           | 52                  | [9]       |
| <i>ampC</i>                  | ampicillin                          | ampC-f: GTGACCAGATACTGGCCACA<br>ampC-r: TTAAGTGTAGCGCCTCGAGGA                                                                  | 100nM<br>100nM       | 56                  | [10]      |
| <i>pbpX2</i>                 | penams, cephamycins, cephalosporins | pbpX2-f: GTATATGACCGCGACCTTGG<br>pbpX2-r: TTCTTGATGCTAGGCATTGC                                                                 | 200nM<br>200nM       | 54                  | [11]      |
| <i>ermA</i>                  | erythromycin                        | ermA-f: CCCGAAAAATACGCAAAATTTTCAT<br>ermA-r: CCCTGTTTACCCATTTATAAACG                                                           | 500nM<br>500nM       | 62                  | [12]      |
| <i>ermB</i>                  | erythromycin                        | ermB-f: GAAAAGGTACTCAACCAATA<br>ermB-r: AGTAACGGTACTTAAATTGTTTAC                                                               | 100nM<br>100nM       | 52                  | [13]      |
| <i>ermC</i>                  | erythromycin                        | ermC-f: AATCGGCTCAGGAAAAGG<br>ermC-r: ATCGTCAATTCTGCATG                                                                        | 100nM<br>100nM       | 54                  | [14]      |
| <i>ermF</i>                  | erythromycin                        | ermF-f: CCT TAT GGC ATT ACT TCC GA<br>ermF-r: GGA CCT ACC TCA TAG ACA AG                                                       | 200nM<br>200nM       | 57                  | [15]      |
| <i>MefI</i>                  | macrolides                          | MefI-f: ATGGAAAAATACAACAATTGGAAA<br>MefI-r: CCAGCTGCTGCGATAATTAA                                                               | 100nM<br>100nM       | 52                  | [13]      |
| <i>mefAI</i>                 | macrolides                          | mefAI-f: TGGTTCGGTGCTTACTATTGT<br>mefAI-r: CCCCTATCAACATTTCCAGA                                                                | 100nM<br>100nM       | 52                  | [16]      |
| <i>mefAII</i>                | macrolides                          | mefAII-f: AGTATCATTAACTACTAGTGC<br>mefAII-r: TTCTTCTGGTACTAAAAGTGG                                                             | 100nM<br>100nM       | 53                  | [17]      |
| <i>patA</i>                  | fluoroquinolones                    | patA-f: ATGTTGTCCTCGCAGCCTAT<br>patA-r: ACGAACCAGATGAACAAGAGG                                                                  | 100nM<br>100nM       | 47                  | [18]      |
| <i>patB</i>                  | fluoroquinolones                    | patB-f: TTGCTGGTTCGGCTGTACTT<br>patB-r: AACTGCTGTCATCTGGCCTT                                                                   | 100nM<br>100nM       | 47                  | [18]      |

|                                                            |                                                 |                                                                           |                |    |      |
|------------------------------------------------------------|-------------------------------------------------|---------------------------------------------------------------------------|----------------|----|------|
| <i>vanA</i>                                                | vancomycin                                      | vanA-f: GGGAAAACGACAATTGC<br>vanA-r: GTACAATGCGGCCGTTA                    | 200nM<br>200nM | 54 | [19] |
| <i>vanB</i>                                                | vancomycin                                      | vanB-f: ATGGGAAGCCGATAGTC<br>vanB-r: GATTTCGTTCTCGACC                     | 200nM<br>200nM | 54 | [19] |
| <i>vanC1</i>                                               | vancomycin                                      | vanC1-f: GGTATCAAGGAAACCTC<br>vanC1-r: CTTCCGCCATCATAGCT                  | 500nM<br>500nM | 50 | [1]  |
| <i>vanC2/3</i>                                             | vancomycin                                      | vanC2/3-f: CTCCTACGATTCTCTTG<br>vanC2/3-r: CGAGCAAGACCTTTAAG              | 500nM<br>500nM | 50 | [1]  |
| <i>vanD</i>                                                | vancomycin                                      | vanD-f: TGTGGGATGCGATATTTCAA<br>vanD-r: TGCAGCCAAGTATCCGGTAA              | 320nM<br>320nM | 54 | [20] |
| <i>vanE</i>                                                | vancomycin                                      | vanD-f: TGTGGGATGCGATATTTCAA<br>vanD-r: TGCAGCCAAGTATCCGGTAA              | 500nM<br>500nM | 52 | [21] |
| <i>mcr-1</i>                                               | colistin                                        | Mcr1-f: AGTCCGTTTGTCTTGTGGC<br>Mcr1-r: AGATCCTTGCTCTCGGCTTG               | 100nM<br>100nM | 58 | [22] |
| <i>IsaC</i>                                                | lincosamides, streptogramins,<br>pleuromutilins | IsaC-f: GGCTATGTAAACCTGTATTTG<br>IsaC-r: ACTGACAATTTTCTTCCGT              | 100nM<br>100nM | 53 | [23] |
| aph(3'')-Ib                                                | amino-glycosides                                | aph(3'')-Ib-f: CTTGGTGATAACGGCAATTC<br>aph(3'')-Ib-r: CCAATCGCAGATAGAAGGC | 400nM<br>400nM | 52 | [24] |
| int-II integrase                                           |                                                 | int-II-f: GCGTGATTGTATCTCACT<br>int-II-r: GACGCTCCTGTTGCTTCT              | 250nM<br>250nM | 50 | [25] |
| xis-II excisionase                                         |                                                 | xis-II-f: AAGCAGACTGACATTCTTA<br>xis-II-r: GCGTCCAATGTATCTATAA            | 250nM<br>250nM | 50 | [25] |
| Universal bacterial PCR as positive control (27f_YM-1492R) |                                                 | 27f-YM: AGAGTTTGATYMTGGCTCAG<br>1492f-long: TACGGYTACCTTGTTACGACTT        | 300nM<br>300nM | 55 | [26] |

**Supplementary Table S2:** Detailed results from MIC passaging for all investigated clinical isolates

| No. | Genus                | Species             | CHX    |         |              |                  |              |               | CPC    |         |              |                  |              |               |
|-----|----------------------|---------------------|--------|---------|--------------|------------------|--------------|---------------|--------|---------|--------------|------------------|--------------|---------------|
|     |                      |                     | P1 MIC | P10 MIC | Factor to P1 | Reevaluation MIC | Factor to P1 | Factor to P10 | P1 MIC | P10 MIC | Factor to P1 | Reevaluation MIC | Factor to P1 | Factor to P10 |
| 1   | <i>Streptococcus</i> | <i>anginosus</i>    | 8      | 16      | 2            | *                | 0            | 0             | 2      | 1       | 0.5          | *                | -            | -             |
| 2   | <i>Streptococcus</i> | <i>anginosus</i>    | 4      | 16      | 4            | 8                | 2            | 0.5           | 1      | 1       | 1            | *                | -            | -             |
| 3   | <i>Streptococcus</i> | <i>anginosus</i>    | 8      | 16      | 2            | *                | 0            | 0             | 2      | 2       | 1            | *                | -            | -             |
| 4   | <i>Streptococcus</i> | <i>anginosus</i>    | 8      | 8       | 1            | *                | 0            | 0             | 2      | 2       | 1            | *                | -            | -             |
| 5   | <i>Streptococcus</i> | <i>anginosus</i>    | 8      | 16      | 2            | *                | 0            | 0             | 4      | 2       | 0.5          | *                | -            | -             |
| 6   | <i>Streptococcus</i> | <i>anginosus</i>    | 8      | 32      | 4            | 16               | 2            | 0.5           | 4      | 2       | 0.5          | *                | -            | -             |
| 7   | <i>Streptococcus</i> | <i>anginosus</i>    | 8      | 16      | 2            | *                | 0            | 0             | 4      | 2       | 0.5          | *                | -            | -             |
| 8   | <i>Streptococcus</i> | <i>anginosus</i>    | 8      | 16      | 2            | *                | 0            | 0             | 1      | 2       | 2            | *                | -            | -             |
| 9   | <i>Streptococcus</i> | <i>anginosus</i>    | 8      | 16      | 2            | *                | 0            | 0             | 4      | 2       | 0.5          | *                | -            | -             |
| 10  | <i>Streptococcus</i> | <i>anginosus</i>    | 2      | 8       | 4            | 16               | 8            | 2             | 2      | 2       | 1            | *                | -            | -             |
| 11  | <i>Streptococcus</i> | <i>anginosus</i>    | 4      | 16      | 4            | 16               | 4            | 1             | 2      | 2       | 1            | *                | -            | -             |
| 12  | <i>Streptococcus</i> | <i>constellatus</i> | 4      | 4       | 1            | *                | 0            | 0             | 1      | 2       | 2            | *                | -            | -             |
| 13  | <i>Streptococcus</i> | <i>oralis</i>       | 2      | 8       | 4            | 32               | 16           | 4             | 1      | 1       | 1            | *                | -            | -             |
| 14  | <i>Streptococcus</i> | <i>oralis</i>       | 4      | 16      | 4            | 32               | 8            | 2             | 4      | 2       | 0.5          | *                | -            | -             |
| 15  | <i>Streptococcus</i> | <i>oralis</i>       | 4      | 16      | 4            | 16               | 4            | 1             | 1      | 1       | 1            | *                | -            | -             |
| 16  | <i>Streptococcus</i> | <i>oralis</i>       | 4      | 16      | 4            | 16               | 4            | 1             | 1      | 1       | 1            | *                | -            | -             |
| 17  | <i>Streptococcus</i> | <i>oralis</i>       | 8      | 16      | 2            | *                | 0            | 0             | 1      | 1       | 1            | *                | -            | -             |
| 18  | <i>Streptococcus</i> | <i>oralis</i>       | 8      | 16      | 2            | *                | 0            | 0             | 1      | 2       | 2            | *                | -            | -             |
| 19  | <i>Streptococcus</i> | <i>oralis</i>       | 4      | 8       | 2            | *                | 0            | 0             | 2      | 2       | 1            | *                | -            | -             |
| 20  | <i>Streptococcus</i> | <i>oralis</i>       | 8      | 16      | 2            | *                | 0            | 0             | 2      | 4       | 2            | *                | -            | -             |
| 21  | <i>Streptococcus</i> | <i>oralis</i>       | 8      | 16      | 2            | *                | 0            | 0             | 2      | 2       | 1            | *                | -            | -             |
| 22  | <i>Streptococcus</i> | <i>oralis</i>       | 8      | 16      | 2            | *                | 0            | 0             | 2      | 2       | 1            | *                | -            | -             |

|    |                      |                  |    |    |     |    |   |   |   |    |      |   |   |      |
|----|----------------------|------------------|----|----|-----|----|---|---|---|----|------|---|---|------|
| 23 | <i>Streptococcus</i> | <i>oralis</i>    | 16 | 16 | 1   | *  | 0 | 0 | 2 | 2  | 1    | * | - | -    |
| 24 | <i>Streptococcus</i> | <i>oralis</i>    | 16 | 8  | 0.5 | *  | 0 | 0 | 2 | 2  | 1    | * | - | -    |
| 25 | <i>Streptococcus</i> | <i>oralis</i>    | 8  | 8  | 1   | *  | 0 | 0 | 2 | 2  | 1    | * | - | -    |
| 27 | <i>Streptococcus</i> | <i>oralis</i>    | 16 | 16 | 1   | *  | 0 | 0 | 2 | 2  | 1    | * | - | -    |
| 28 | <i>Streptococcus</i> | <i>oralis</i>    | 8  | 16 | 2   | *  | 0 | 0 | 2 | 4  | 2    | * | - | -    |
| 29 | <i>Streptococcus</i> | <i>oralis</i>    | 4  | 16 | 4   | 16 | 4 | 1 | 4 | 4  | 1    | * | - | -    |
| 30 | <i>Streptococcus</i> | <i>oralis</i>    | 32 | 16 | 0.5 | *  | 0 | 0 | 2 | 8  | 4    | 2 | 1 | 0.25 |
| 31 | <i>Streptococcus</i> | <i>oralis</i>    | 16 | 16 | 1   | *  | 0 | 0 | 2 | 2  | 1    | * | - | -    |
| 32 | <i>Streptococcus</i> | <i>oralis</i>    | 32 | 16 | 0.5 | *  | 0 | 0 | 2 | 2  | 1    | * | - | -    |
| 33 | <i>Streptococcus</i> | <i>oralis</i>    | 16 | 16 | 1   | *  | 0 | 0 | 2 | 4  | 2    | * | - | -    |
| 34 | <i>Streptococcus</i> | <i>oralis</i>    | 16 | 16 | 1   | *  | 0 | 0 | 2 | 4  | 2    | * | - | -    |
| 35 | <i>Streptococcus</i> | <i>oralis</i>    | 32 | 16 | 0.5 | *  | 0 | 0 | 2 | 2  | 1    | * | - | -    |
| 36 | <i>Streptococcus</i> | <i>oralis</i>    | 32 | 16 | 0.5 | *  | 0 | 0 | 2 | 2  | 1    | * | - | -    |
| 37 | <i>Streptococcus</i> | <i>sanguinis</i> | 16 | 8  | 0.5 | *  | 0 | 0 | 2 | 4  | 2    | * | - | -    |
| 38 | <i>Streptococcus</i> | <i>sanguinis</i> | 8  | 16 | 2   | *  | 0 | 0 | 2 | 4  | 2    | * | - | -    |
| 39 | <i>Streptococcus</i> | <i>sanguinis</i> | 8  | 8  | 1   | *  | 0 | 0 | 4 | 4  | 1    | * | - | -    |
| 40 | <i>Streptococcus</i> | <i>sanguinis</i> | 16 | 8  | 0.5 | *  | 0 | 0 | 4 | 4  | 1    | * | - | -    |
| 41 | <i>Streptococcus</i> | <i>sanguinis</i> | 16 | 16 | 1   | *  | 0 | 0 | 4 | 2  | 0.5  | * | - | -    |
| 42 | <i>Streptococcus</i> | <i>sanguinis</i> | 32 | 16 | 0.5 | *  | 0 | 0 | 4 | 16 | 4    | 8 | 2 | 0.5  |
| 43 | <i>Streptococcus</i> | <i>sanguinis</i> | 32 | 32 | 1   | *  | 0 | 0 | 4 | 2  | 0.5  | * | - | -    |
| 44 | <i>Streptococcus</i> | <i>sanguinis</i> | 32 | 16 | 0.5 | *  | 0 | 0 | 2 | 2  | 1    | * | - | -    |
| 45 | <i>Streptococcus</i> | <i>sanguinis</i> | 8  | 16 | 2   | *  | 0 | 0 | 2 | 4  | 2    | * | - | -    |
| 46 | <i>Streptococcus</i> | <i>sanguinis</i> | 8  | 16 | 2   | *  | 0 | 0 | 4 | 2  | 0.5  | * | - | -    |
| 47 | <i>Streptococcus</i> | <i>sanguinis</i> | 16 | 32 | 2   | *  | 0 | 0 | 8 | 2  | 0.25 | * | - | -    |
| 48 | <i>Streptococcus</i> | <i>sanguinis</i> | 32 | 16 | 0.5 | *  | 0 | 0 | 8 | 2  | 0.25 | * | - | -    |
| 49 | <i>Streptococcus</i> | <i>sanguinis</i> | 32 | 16 | 0.5 | *  | 0 | 0 | 8 | 2  | 0.25 | * | - | -    |
| 50 | <i>Streptococcus</i> | <i>sanguinis</i> | 4  | 8  | 2   | *  | 0 | 0 | 4 | 2  | 0.5  | * | - | -    |
| 51 | <i>Streptococcus</i> | <i>sanguinis</i> | 2  | 8  | 4   | 8  | 4 | 1 | 8 | 2  | 0.25 | * | - | -    |
| 52 | <i>Streptococcus</i> | <i>sanguinis</i> | 4  | 4  | 1   | *  | 0 | 0 | 4 | 2  | 0.5  | * | - | -    |
| 53 | <i>Streptococcus</i> | <i>sanguinis</i> | 4  | 4  | 1   | *  | 0 | 0 | 4 | 2  | 0.5  | * | - | -    |

|    |                      |                      |     |    |     |    |   |   |   |    |      |   |   |     |
|----|----------------------|----------------------|-----|----|-----|----|---|---|---|----|------|---|---|-----|
| 56 | <i>Streptococcus</i> | <i>sanguinis</i>     | 4   | 4  | 1   | *  | 0 | 0 | 4 | 16 | 4    | 8 | 2 | 0.5 |
| 57 | <i>Streptococcus</i> | <i>intermedius</i>   | 4   | 8  | 2   | *  | 0 | 0 | 8 | 4  | 0.5  | * | - | -   |
| 59 | <i>Streptococcus</i> | <i>mutans</i>        | 0.5 | 4  | 8   | 4  | 8 | 1 | 8 | 2  | 0.25 | * | - | -   |
| 60 | <i>Streptococcus</i> | <i>gordonii</i>      | 8   | 8  | 1   | *  | 0 | 0 | 8 | 4  | 0.5  | * | - | -   |
| 61 | <i>Streptococcus</i> | <i>gordonii</i>      | 8   | 16 | 2   | *  | 0 | 0 | 2 | 4  | 2    | * | - | -   |
| 62 | <i>Streptococcus</i> | <i>gordonii</i>      | 4   | 16 | 4   | 32 | 8 | 2 | 2 | 4  | 2    | * | - | -   |
| 63 | <i>Streptococcus</i> | <i>gordonii</i>      | 8   | 16 | 2   | *  | 0 | 0 | 4 | 1  | 0.25 | * | - | -   |
| 64 | <i>Streptococcus</i> | <i>gordonii</i>      | 4   | 16 | 4   | 32 | 8 | 2 | 2 | 1  | 0.5  | * | - | -   |
| 65 | <i>Streptococcus</i> | <i>gordonii</i>      | 4   | 16 | 4   | 16 | 4 | 1 | 2 | 4  | 2    | * | - | -   |
| 66 | <i>Streptococcus</i> | <i>gordonii</i>      | 8   | 8  | 1   | *  | 0 | 0 | 2 | 4  | 2    | * | - | -   |
| 67 | <i>Streptococcus</i> | <i>gordonii</i>      | 4   | 8  | 2   | *  | 0 | 0 | 4 | 4  | 1    | * | - | -   |
| 68 | <i>Streptococcus</i> | <i>gordonii</i>      | 4   | 16 | 4   | 16 | 4 | 1 | 4 | 2  | 0.5  | * | - | -   |
| 69 | <i>Streptococcus</i> | <i>salivarius</i>    | 2   | 8  | 4   | 8  | 4 | 1 | 2 | 2  | 1    | * | - | -   |
| 70 | <i>Streptococcus</i> | <i>salivarius</i>    | 4   | 8  | 2   | *  | 0 | 0 | 2 | 2  | 1    | * | - | -   |
| 73 | <i>Streptococcus</i> | <i>salivarius</i>    | 1   | 8  | 8   | 8  | 8 | 1 | 2 | 2  | 1    | * | - | -   |
| 74 | <i>Streptococcus</i> | <i>salivarius</i>    | 4   | 16 | 4   | 16 | 4 | 1 | 2 | 2  | 1    | * | - | -   |
| 75 | <i>Streptococcus</i> | <i>salivarius</i>    | 4   | 4  | 1   | *  | 0 | 0 | 2 | 2  | 1    | * | - | -   |
| 76 | <i>Streptococcus</i> | <i>salivarius</i>    | 4   | 2  | 0.5 | *  | 0 | 0 | 2 | 2  | 1    | * | - | -   |
| 77 | <i>Streptococcus</i> | <i>sobrinus</i>      | 4   | 4  | 1   | *  | 0 | 0 | 2 | 2  | 1    | * | - | -   |
| 78 | <i>Streptococcus</i> | <i>vestibularis</i>  | 1   | 8  | 8   | 8  | 8 | 1 | 2 | 1  | 0.5  | * | - | -   |
| 80 | <i>Streptococcus</i> | <i>downii</i>        | 4   | 16 | 4   | 16 | 4 | 1 | 4 | 1  | 0.25 | * | - | -   |
| 81 | <i>Streptococcus</i> | <i>downii</i>        | 4   | 16 | 4   | 16 | 4 | 1 | 2 | 1  | 0.5  | * | - | -   |
| 82 | <i>Streptococcus</i> | <i>parasanguinis</i> | 4   | 8  | 2   | *  | 0 | 0 | 4 | 2  | 0.5  | * | - | -   |
| 83 | <i>Streptococcus</i> | <i>parasanguinis</i> | 8   | 16 | 2   | *  | 0 | 0 | 2 | 2  | 1    | * | - | -   |
| 84 | <i>Streptococcus</i> | <i>parasanguinis</i> | 4   | 16 | 4   | 32 | 8 | 2 | 4 | 2  | 0.5  | * | - | -   |
| 85 | <i>Streptococcus</i> | <i>parasanguinis</i> | 4   | 16 | 4   | 16 | 4 | 1 | 4 | 2  | 0.5  | * | - | -   |
| 86 | <i>Streptococcus</i> | <i>parasanguinis</i> | 4   | 16 | 4   | 16 | 4 | 1 | 4 | 2  | 0.5  | * | - | -   |
| 87 | <i>Streptococcus</i> | <i>parasanguinis</i> | 8   | 16 | 2   | *  | 0 | 0 | 2 | 2  | 1    | * | - | -   |
| 89 | <i>Streptococcus</i> | <i>mitis</i>         | 4   | 4  | 1   | *  | 0 | 0 | 2 | 2  | 1    | * | - | -   |
| 90 | <i>Streptococcus</i> | <i>oralis</i>        | 4   | 16 | 4   | 32 | 8 | 2 | 4 | 2  | 0.5  | * | - | -   |

|     |                      |                  |   |   |     |   |   |     |     |   |     |   |   |      |
|-----|----------------------|------------------|---|---|-----|---|---|-----|-----|---|-----|---|---|------|
| 91  | <i>Streptococcus</i> | <i>mitis</i>     | 2 | 4 | 2   | * | 0 | 0   | 1   | 2 | 2   | * | - | -    |
| 92  | <i>Streptococcus</i> | <i>mitis</i>     | 2 | 4 | 2   | * | 0 | 0   | 1   | 2 | 2   | * | - | -    |
| 93  | <i>Streptococcus</i> | <i>mitis</i>     | 1 | 8 | 8   | 8 | 8 | 1   | 1   | 1 | 1   | * | - | -    |
| 94  | <i>Streptococcus</i> | <i>mitis</i>     | 2 | 8 | 4   | 4 | 2 | 0.5 | 1   | 2 | 2   | * | - | -    |
| 95  | <i>Streptococcus</i> | <i>mitis</i>     | 2 | 4 | 2   | * | 0 | 0   | 1   | 2 | 2   | * | - | -    |
| 96  | <i>Streptococcus</i> | <i>mitis</i>     | 2 | 8 | 4   | 8 | 4 | 1   | 1   | 1 | 1   | * | - | -    |
| 97  | <i>Streptococcus</i> | <i>mitis</i>     | 4 | 8 | 2   | * | 0 | 0   | 0.5 | 2 | 4   | * | - | -    |
| 98  | <i>Streptococcus</i> | <i>mitis</i>     | 4 | 8 | 2   | * | 0 | 0   | 1   | 2 | 2   | * | - | -    |
| 99  | <i>Streptococcus</i> | <i>mitis</i>     | 4 | 8 | 2   | * | 0 | 0   | 1   | 2 | 2   | * | - | -    |
| 100 | <i>Streptococcus</i> | <i>mitis</i>     | 4 | 8 | 2   | * | 0 | 0   | 1   | 2 | 2   | * | - | -    |
| 101 | <i>Streptococcus</i> | <i>mutans</i>    | 4 | 4 | 1   | * | 0 | 0   | 2   | 4 | 2   | * | - | -    |
| 102 | <i>Streptococcus</i> | <i>mutans</i>    | 4 | 8 | 2   | * | 0 | 0   | 2   | 4 | 2   | * | - | -    |
| 103 | <i>Streptococcus</i> | <i>mutans</i>    | 4 | 4 | 1   | * | 0 | 0   | 2   | 4 | 2   | * | - | -    |
| 104 | <i>Streptococcus</i> | <i>mutans</i>    | 4 | 4 | 1   | * | 0 | 0   | 2   | 1 | 0.5 | * | - | -    |
| 105 | <i>Streptococcus</i> | <i>mutans</i>    | 4 | 8 | 2   | * | 0 | 0   | 2   | 4 | 2   | * | - | -    |
| 106 | <i>Streptococcus</i> | <i>mutans</i>    | 8 | 4 | 0.5 | * | 0 | 0   | 2   | 4 | 2   | * | - | -    |
| 107 | <i>Streptococcus</i> | <i>mutans</i>    | 4 | 4 | 1   | * | 0 | 0   | 2   | 2 | 1   | * | - | -    |
| 108 | <i>Streptococcus</i> | <i>mutans</i>    | 4 | 4 | 1   | * | 0 | 0   | 2   | 4 | 2   | * | - | -    |
| 109 | <i>Streptococcus</i> | <i>mutans</i>    | 4 | 4 | 1   | * | 0 | 0   | 2   | 8 | 4   | 2 | 1 | 0.25 |
| 110 | <i>Streptococcus</i> | <i>mutans</i>    | 8 | 8 | 1   | * | 0 | 0   | 2   | 4 | 2   | * | - | -    |
| 111 | <i>Streptococcus</i> | <i>mutans</i>    | 4 | 4 | 1   | * | 0 | 0   | 2   | 2 | 1   | * | - | -    |
| 112 | <i>Streptococcus</i> | <i>mutans</i>    | 4 | 4 | 1   | * | 0 | 0   | 2   | 2 | 1   | * | - | -    |
| 113 | <i>Streptococcus</i> | <i>mutans</i>    | 4 | 4 | 1   | * | 0 | 0   | 2   | 2 | 1   | * | - | -    |
| 114 | <i>Streptococcus</i> | <i>mutans</i>    | 4 | 4 | 1   | * | 0 | 0   | 2   | 4 | 2   | * | - | -    |
| 115 | <i>Streptococcus</i> | <i>mutans</i>    | 4 | 4 | 1   | * | 0 | 0   | 2   | 4 | 2   | * | - | -    |
| 116 | <i>Streptococcus</i> | <i>mutans</i>    | 4 | 8 | 2   | * | 0 | 0   | 2   | 2 | 1   | * | - | -    |
| 117 | <i>Streptococcus</i> | <i>mutans</i>    | 4 | 4 | 1   | * | 0 | 0   | 2   | 2 | 1   | * | - | -    |
| 118 | <i>Streptococcus</i> | <i>cristatus</i> | 4 | 8 | 2   | * | 0 | 0   | 2   | 4 | 2   | * | - | -    |
| 119 | <i>Streptococcus</i> | <i>cristatus</i> | 2 | 4 | 2   | * | 0 | 0   | 1   | 4 | 4   | 8 | 8 | 2    |
| 120 | <i>Streptococcus</i> | <i>cristatus</i> | 2 | 4 | 2   | * | 0 | 0   | 1   | 1 | 1   | * | - | -    |

|     |                    |                      |     |   |     |   |   |   |   |   |     |   |   |   |
|-----|--------------------|----------------------|-----|---|-----|---|---|---|---|---|-----|---|---|---|
| 201 | <i>Actinomyces</i> | <i>naeslundii</i>    | 2   | 2 | 1   | * | - | - | 1 | 2 | 2   | * | - | - |
| 202 | <i>Actinomyces</i> | <i>naeslundii</i>    | 1   | 2 | 2   | * | - | - | 1 | 2 | 2   | * | - | - |
| 203 | <i>Actinomyces</i> | <i>naeslundii</i>    | 2   | 2 | 1   | * | - | - | 2 | 2 | 1   | * | - | - |
| 204 | <i>Actinomyces</i> | <i>naeslundii</i>    | 1   | 2 | 2   | * | - | - | 2 | 1 | 0,5 | * | - | - |
| 205 | <i>Actinomyces</i> | <i>naeslundii</i>    | 2   | 2 | 1   | * | - | - | 2 | 2 | 1   | * | - | - |
| 206 | <i>Actinomyces</i> | <i>naeslundii</i>    | 0.5 | 1 | 2   | * | - | - | 2 | 2 | 1   | * | - | - |
| 207 | <i>Actinomyces</i> | <i>naeslundii</i>    | 0.5 | 1 | 2   | * | - | - | 2 | 2 | 1   | * | - | - |
| 208 | <i>Actinomyces</i> | <i>oris</i>          | 2   | 2 | 1   | * | - | - | 2 | 2 | 1   | * | - | - |
| 209 | <i>Actinomyces</i> | <i>oris</i>          | 0.5 | 2 | 4   | * | - | - | 4 | 2 | 0,5 | * | - | - |
| 210 | <i>Actinomyces</i> | <i>oris</i>          | 2   | 2 | 1   | * | - | - | 4 | 4 | 1   | * | - | - |
| 211 | <i>Actinomyces</i> | <i>oris</i>          | 4   | 4 | 1   | * | - | - | 4 | 2 | 0,5 | * | - | - |
| 212 | <i>Actinomyces</i> | <i>oris</i>          | 1   | 4 | 4   | * | - | - | 4 | 2 | 0,5 | * | - | - |
| 213 | <i>Actinomyces</i> | <i>odontolyticus</i> | 4   | 4 | 1   | * | - | - | 4 | 2 | 0,5 | * | - | - |
| 214 | <i>Actinomyces</i> | <i>odontolyticus</i> | 4   | 4 | 1   | * | - | - | 4 | 2 | 0,5 | * | - | - |
| 215 | <i>Actinomyces</i> | <i>odontolyticus</i> | 8   | 4 | 0.5 | * | - | - | 4 | 2 | 0,5 | * | - | - |
| 216 | <i>Actinomyces</i> | <i>odontolyticus</i> | 4   | 2 | 0.5 | * | - | - | 4 | 2 | 0,5 | * | - | - |
| 217 | <i>Actinomyces</i> | <i>odontolyticus</i> | 4   | 4 | 1   | * | - | - | 4 | 2 | 0,5 | * | - | - |
| 218 | <i>Actinomyces</i> | <i>odontolyticus</i> | 2   | 2 | 1   | * | - | - | 4 | 2 | 0,5 | * | - | - |
| 219 | <i>Actinomyces</i> | <i>odontolyticus</i> | 1   | 2 | 2   | * | - | - | 2 | 2 | 1   | * | - | - |
| 301 | <i>Rothia</i>      | <i>aeria</i>         | 2   | 2 | 1   | * | - | - | 4 | 2 | 0,5 | * | - | - |
| 302 | <i>Rothia</i>      | <i>aeria</i>         | 2   | 2 | 1   | * | - | - | 4 | 2 | 0,5 | * | - | - |
| 303 | <i>Rothia</i>      | <i>aeria</i>         | 1   | 2 | 2   | * | - | - | 4 | 2 | 0,5 | * | - | - |
| 304 | <i>Rothia</i>      | <i>aeria</i>         | 4   | 4 | 1   | * | - | - | 2 | 2 | 1   | * | - | - |
| 305 | <i>Rothia</i>      | <i>aeria</i>         | 4   | 8 | 2   | * | - | - | 2 | 2 | 1   | * | - | - |
| 306 | <i>Rothia</i>      | <i>aeria</i>         | 4   | 4 | 1   | * | - | - | 2 | 2 | 1   | * | - | - |
| 307 | <i>Rothia</i>      | <i>dentocariosa</i>  | 4   | 4 | 1   | * | - | - | 2 | 2 | 1   | * | - | - |
| 308 | <i>Rothia</i>      | <i>dentocariosa</i>  | 4   | 4 | 1   | * | - | - | 2 | 2 | 1   | * | - | - |



|     |                    |                     |     |   |     |   |   |   |     |   |     |   |   |   |
|-----|--------------------|---------------------|-----|---|-----|---|---|---|-----|---|-----|---|---|---|
| 309 | <i>Rothia</i>      | <i>dentocariosa</i> | 4   | 4 | 1   | * | - | - | 2   | 2 | 1   | * | - | - |
| 310 | <i>Rothia</i>      | <i>dentocariosa</i> | 4   | 4 | 1   | * | - | - | 2   | 1 | 0,5 | * | - | - |
| 311 | <i>Rothia</i>      | <i>dentocariosa</i> | 4   | 4 | 1   | * | - | - | 2   | 2 | 1   | * | - | - |
| 312 | <i>Rothia</i>      | <i>dentocariosa</i> | 4   | 4 | 1   | * | - | - | 2   | 2 | 1   | * | - | - |
| 313 | <i>Rothia</i>      | <i>mucilaginoso</i> | 4   | 8 | 2   | * | - | - | 2   | 2 | 1   | * | - | - |
| 314 | <i>Rothia</i>      | <i>mucilaginoso</i> | 4   | 8 | 2   | * | - | - | 2   | 2 | 1   | * | - | - |
| 315 | <i>Rothia</i>      | <i>mucilaginoso</i> | 4   | 4 | 1   | * | - | - | 2   | 2 | 1   | * | - | - |
| 316 | <i>Rothia</i>      | <i>mucilaginoso</i> | 2   | 4 | 2   | * | - | - | 1   | 2 | 2   | * | - | - |
| 317 | <i>Rothia</i>      | <i>mucilaginoso</i> | 4   | 4 | 1   | * | - | - | 4   | 2 | 0,5 | * | - | - |
| 318 | <i>Rothia</i>      | <i>mucilaginoso</i> | 2   | 4 | 2   | * | - | - | 1   | 1 | 1   | * | - | - |
| 319 | <i>Rothia</i>      | <i>mucilaginoso</i> | 4   | 4 | 1   | * | - | - | 1   | 2 | 2   | * | - | - |
| 320 | <i>Rothia</i>      | <i>aeria</i>        | 2   | 4 | 2   | * | - | - | 1   | 2 | 2   | * | - | - |
|     |                    |                     |     |   |     |   |   |   |     |   |     |   |   |   |
| 401 | <i>Veillonella</i> | <i>atypica</i>      | 1   | 2 | 2   | * | - | - | 1   | 2 | 2   | * | - | - |
| 402 | <i>Veillonella</i> | <i>atypica</i>      | 1   | 2 | 2   | * | - | - | 1   | 2 | 2   | * | - | - |
| 403 | <i>Veillonella</i> | <i>atypica</i>      | 1   | 1 | 1   | * | - | - | 1   | 2 | 2   | * | - | - |
| 404 | <i>Veillonella</i> | <i>atypica</i>      | 1   | 2 | 2   | * | - | - | 1   | 1 | 1   | * | - | - |
| 405 | <i>Veillonella</i> | <i>atypica</i>      | 1   | 2 | 2   | * | - | - | 2   | 2 | 1   | * | - | - |
| 406 | <i>Veillonella</i> | <i>atypica</i>      | 2   | 1 | 0.5 | * | - | - | 1   | 2 | 2   | * | - | - |
| 407 | <i>Veillonella</i> | <i>atypica</i>      | 2   | 2 | 1   | * | - | - | 2   | 1 | 0.5 | * | - | - |
| 408 | <i>Veillonella</i> | <i>atypica</i>      | 0.5 | 1 | 2   | * | - | - | 1   | 2 | 2   | * | - | - |
| 409 | <i>Veillonella</i> | <i>atypica</i>      | 1   | 1 | 1   | * | - | - | 2   | 2 | 1   | * | - | - |
| 410 | <i>Veillonella</i> | <i>atypica</i>      | 1   | 2 | 2   | * | - | - | 0.5 | 1 | 2   | * | - | - |
| 411 | <i>Veillonella</i> | <i>dispar</i>       | 2   | 1 | 0.5 | * | - | - | 1   | 2 | 2   | * | - | - |
| 412 | <i>Veillonella</i> | <i>dispar</i>       | 2   | 1 | 0.5 | * | - | - | 0.5 | 2 | 4   | 4 | 8 | 2 |
| 413 | <i>Veillonella</i> | <i>parvula</i>      | 1   | 1 | 1   | * | - | - | 1   | 2 | 2   | * | - | - |
| 414 | <i>Veillonella</i> | <i>parvula</i>      | 1   | 2 | 2   | * | - | - | 1   | 2 | 2   | * | - | - |
| 415 | <i>Veillonella</i> | <i>parvula</i>      | 2   | 2 | 1   | * | - | - | 2   | 4 | 2   | * | - | - |
| 417 | <i>Veillonella</i> | <i>parvula</i>      | 2   | 2 | 1   | * | - | - | 2   | 2 | 1   | * | - | - |

|     |                    |                |   |   |     |   |   |   |   |   |     |   |   |   |
|-----|--------------------|----------------|---|---|-----|---|---|---|---|---|-----|---|---|---|
| 418 | <i>Veillonella</i> | <i>parvula</i> | 1 | 2 | 2   | * | - | - | 2 | 2 | 1   | * | - | - |
| 419 | <i>Veillonella</i> | <i>parvula</i> | 1 | 1 | 1   | * | - | - | 1 | 2 | 2   | * | - | - |
| 420 | <i>Veillonella</i> | <i>parvula</i> | 2 | 1 | 0.5 | * | - | - | 1 | 2 | 2   | * | - | - |
| 421 | <i>Veillonella</i> | <i>parvula</i> | 1 | 1 | 1   | * | - | - | 2 | 2 | 1   | * | - | - |
| 422 | <i>Veillonella</i> | <i>parvula</i> | 2 | 2 | 1   | * | - | - | 1 | 2 | 2   | * | - | - |
| 423 | <i>Veillonella</i> | <i>parvula</i> | 2 | 2 | 1   | * | - | - | 2 | 2 | 1   | * | - | - |
| 424 | <i>Veillonella</i> | <i>parvula</i> | 1 | 1 | 1   | * | - | - | 1 | 2 | 2   | * | - | - |
| 425 | <i>Veillonella</i> | <i>parvula</i> | 2 | 1 | 0.5 | * | - | - | 2 | 2 | 1   | * | - | - |
| 426 | <i>Veillonella</i> | <i>parvula</i> | 2 | 2 | 1   | * | - | - | 2 | 1 | 0.5 | * | - | - |
| 427 | <i>Veillonella</i> | <i>parvula</i> | 2 | 1 | 0.5 | * | - | - | 1 | 2 | 2   | * | - | - |

## References

1. Lins, R.X.; Oliveira Andrade, A. de; Hirata Junior, R.; Wilson, M.J.; Lewis, M.A.; Williams, D.W.; Fidel, R.A.S. Antimicrobial resistance and virulence traits of *Enterococcus faecalis* from primary endodontic infections. *J. Dent.* **2013**, *41*, 779–786, doi:10.1016/j.jdent.2013.07.004.
2. Poyart, C.; Jardy, L.; Quesne, G.; Berche, P.; Trieu-Cuot, P. Genetic Basis of Antibiotic Resistance in *Streptococcus agalactiae* Strains Isolated in a French Hospital. *Antimicrob Agents Chemother* **2003**, *47*, 794–797, doi:10.1128/AAC.47.2.794-797.2003.
3. Aminov, R.I.; Garrigues-Jeanjean, N.; Mackie, R.I. Molecular Ecology of Tetracycline Resistance: Development and Validation of Primers for Detection of Tetracycline Resistance Genes Encoding Ribosomal Protection Proteins. *Appl Environ Microbiol* **2001**, *67*, 22–32, doi:10.1128/AEM.67.1.22-32.2001.
4. Lanz, R.; Kuhnert, P.; Boerlin, P. Antimicrobial resistance and resistance gene determinants in clinical *Escherichia coli* from different animal species in Switzerland. *Veterinary Microbiology* **2003**, *91*, 73–84, doi:10.1016/S0378-1135(02)00263-8.
5. Call, D.R.; Bakko, M.K.; Krug, M.J.; Roberts, M.C. Identifying Antimicrobial Resistance Genes with DNA Microarrays. *Antimicrob Agents Chemother* **2003**, *47*, 3290–3295, doi:10.1128/AAC.47.10.3290-3295.2003.
6. Iwahara, K.; Kuriyama, T.; Shimura, S.; Williams, D.W.; Yanagisawa, M.; Nakagawa, K.; Karasawa, T. Detection of *cfxA* and *cfxA2*, the beta-lactamase genes of *Prevotella* spp., in clinical samples from dentoalveolar infection by real-time PCR. *J. Clin. Microbiol.* **2006**, *44*, 172–176, doi:10.1128/JCM.44.1.172-176.2006.
7. Dutour, C.; Bonnet, R.; Marchandin, H.; Boyer, M.; Chanal, C.; Sirot, D.; Sirot, J. CTX-M-1, CTX-M-3, and CTX-M-14 beta-lactamases from Enterobacteriaceae isolated in France. *Antimicrob. Agents Chemother.* **2002**, *46*, 534–537, doi:10.1128/AAC.46.2.534-537.2002.
8. Ehrmann, E.; Handal, T.; Tamanai-Shacoori, Z.; Bonnaure-Mallet, M.; Fosse, T. High prevalence of -lactam and macrolide resistance genes in human oral Capnocytophaga species. *Journal of Antimicrobial Chemotherapy* **2014**, *69*, 381–384, doi:10.1093/jac/dkt350.
9. Voha, C.; Docquier, J.-D.; Rossolini, G.M.; Fosse, T. Genetic and biochemical characterization of FUS-1 (OXA-85), a narrow-spectrum class D beta-lactamase from *Fusobacterium nucleatum* subsp. polymorphum. *Antimicrob. Agents Chemother.* **2006**, *50*, 2673–2679, doi:10.1128/AAC.00058-06.
10. Böckelmann, U.; Dörries, H.-H.; Ayuso-Gabella, M.N.; Salgot de Marçay, M.; Tandoi, V.; Levantesi, C.; Masciopinto, C.; van Houtte, E.; Szewzyk, U.; Wintgens, T.; et al. Quantitative PCR Monitoring of Antibiotic Resistance Genes and Bacterial Pathogens in Three European Artificial Groundwater Recharge Systems. *Appl Environ Microbiol* **2009**, *75*, 154–163, doi:10.1128/AEM.01649-08.
11. Nakayama, A.; Takao, A.  $\beta$ -Lactam resistance in *Streptococcus mitis* isolated from saliva of healthy subjects. *Journal of Infection and Chemotherapy* **2003**, *9*, 321–327, doi:10.1007/s10156-003-0286-Y.
12. Malhotra-Kumar, S.; Lammens, C.; Piessens, J.; Goossens, H. Multiplex PCR for Simultaneous Detection of Macrolide and Tetracycline Resistance Determinants in Streptococci. *Antimicrob Agents Chemother* **2005**, *49*, 4798–4800, doi:10.1128/AAC.49.11.4798-4800.2005.
13. Reinert, R.R.; Filimonova, O.Y.; Al-Lahham, A.; Grudinina, S.A.; Ilina, E.N.; Weigel, L.M.; Sidorenko, S.V. Mechanisms of Macrolide Resistance among *Streptococcus pneumoniae* Isolates from Russia. *Antimicrob Agents Chemother* **2008**, *52*, 2260–2262, doi:10.1128/AAC.01270-07.

14. Perreten, V.; Vorlet-Fawer, L.; Slickers, P.; Ehricht, R.; Kuhnert, P.; Frey, J. Microarray-Based Detection of 90 Antibiotic Resistance Genes of Gram-Positive Bacteria. *J Clin Microbiol* **2005**, *43*, 2291–2302, doi:10.1128/JCM.43.5.2291-2302.2005.
15. Kangaba, A.A.; Saglam, F.Y.; Tokman, H.B.; Torun, M.; Torun, M.M. The prevalence of enterotoxin and antibiotic resistance genes in clinical and intestinal *Bacteroides fragilis* group isolates in Turkey. *Anaerobe* **2015**, *35*, 72–76, doi:10.1016/j.anaerobe.2015.07.008.
16. Daly, M.M.; Doktor, S.; Flamm, R.; Shortridge, D. Characterization and prevalence of MefA, MefE, and the associated msr(D) gene in *Streptococcus pneumoniae* clinical isolates. *J Clin Microbiol* **2004**, *42*, 3570–3574, doi:10.1128/JCM.42.8.3570-3574.2004.
17. Sutcliffe, J.; Grebe, T.; Tait-Kamradt, A.; Wondrack, L. Detection of erythromycin-resistant determinants by PCR. *Antimicrob Agents Chemother* **1996**, *40*, 2562–2566, doi:10.1128/AAC.40.11.2562.
18. Garvey, M.I.; Baylay, A.J.; Wong, R.L.; Piddock, L.J.V. Overexpression of patA and patB, which encode ABC transporters, is associated with fluoroquinolone resistance in clinical isolates of *Streptococcus pneumoniae*. *Antimicrob Agents Chemother* **2011**, *55*, 190–196, doi:10.1128/AAC.00672-10.
19. Dutka-Malen, S.; Evers, S.; Courvalin, P. Detection of glycopeptide resistance genotypes and identification to the species level of clinically relevant enterococci by PCR. *J Clin Microbiol* **1995**, *33*, 24–27, doi:10.1128/jcm.33.1.24-27.1995.
20. Depardieu, F.; Perichon, B.; Courvalin, P. Detection of the van Alphabet and Identification of Enterococci and Staphylococci at the Species Level by Multiplex PCR. *J Clin Microbiol* **2004**, *42*, 5857–5860, doi:10.1128/JCM.42.12.5857-5860.2004.
21. Fines, M.; Perichon, B.; Reynolds, P.; Sahm, D.F.; Courvalin, P. VanE, a New Type of Acquired Glycopeptide Resistance in *Enterococcus faecalis* BM4405. *Antimicrob Agents Chemother* **1999**, *43*, 2161–2164, doi:10.1128/AAC.43.9.2161.
22. Rebelo, A.R.; Bortolaia, V.; Kjeldgaard, J.S.; Pedersen, S.K.; Leekitcharoenphon, P.; Hansen, I.M.; Guerra, B.; Malorny, B.; Borowiak, M.; Hammerl, J.A.; et al. Multiplex PCR for detection of plasmid-mediated colistin resistance determinants, mcr-1, mcr-2, mcr-3, mcr-4 and mcr-5 for surveillance purposes. *Eurosurveillance* **2018**, *23*, doi:10.2807/1560-7917.ES.2018.23.6.17-00672.
23. Malbruny, B.; Werno, A.M.; Murdoch, D.R.; Leclercq, R.; Cattoir, V. Cross-Resistance to Lincosamides, Streptogramins A, and Pleuromutilins Due to the Isa (C) Gene in *Streptococcus agalactiae* UCN70. *Antimicrob. Agents Chemother.* **2011**, *55*, 1470–1474, doi:10.1128/AAC.01068-10.
24. Navas, J.; Fernández-Martínez, M.; Salas, C.; Cano, M.E.; Martínez-Martínez, L. Susceptibility to Aminoglycosides and Distribution of aph and aac(3)-XI Genes among *Corynebacterium striatum* Clinical Isolates. *PLoS ONE* **2016**, *11*, e0167856, doi:10.1371/journal.pone.0167856.
25. Calatayud, L.; Ardanuy, C.; Cercenado, E.; Fenoll, A.; Bouza, E.; Pallares, R.; Martín, R.; Liñares, J. Serotypes, Clones, and Mechanisms of Resistance of Erythromycin-Resistant *Streptococcus pneumoniae* Isolates Collected in Spain. *Antimicrob Agents Chemother* **2007**, *51*, 3240–3246, doi:10.1128/AAC.00157-07.
26. Anderson, A.C.; Sanunu, M.; Schneider, C.; Clad, A.; Karygianni, L.; Hellwig, E.; Al-Ahmad, A. Rapid species-level identification of vaginal and oral lactobacilli using MALDI-TOF MS analysis and 16S rDNA sequencing. *BMC Microbiol* **2014**, *14*, 312, doi:10.1186/s12866-014-0312-5.
